# Supplementary material
Source: Springer Nature journal article supplement (https://www.springermedizin.de/resource/supplementary/12885_2011_2967_MOESM1_ESM.pdf/9462410)
Supplement: MOESM1 [file 9462410]

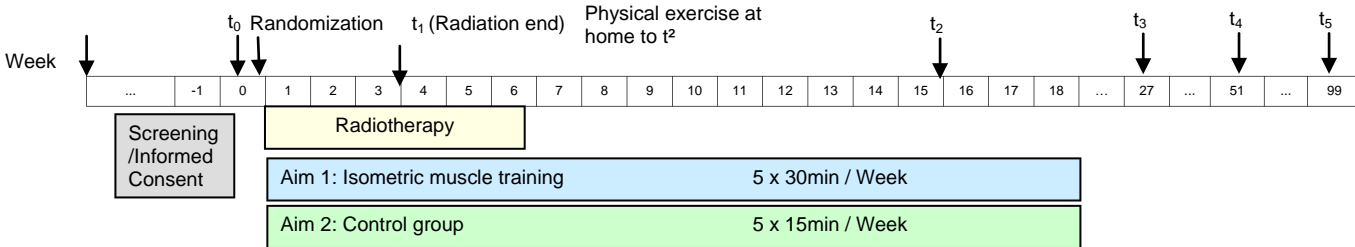

End points:

|                                          |                 |
|------------------------------------------|-----------------|
| Fatigue, Quality of life, Anxiety, Pain: | $t_0 - t_5$     |
| Feasibility, Biomarker (blood, urine) :  | $t_0, t_2$      |
| Bone density:                            | $t_0, t_2, t^3$ |
